# Supplementary material for: Facile synthesis of magnetic hierarchical MgO–MgFe2O4 composites and their adsorption performance towards Congo red
Source: Royal Society of Chemistry journal article supplement (doi:10.1039/c4ra02313g), 2014-01-01
Supplement: c4ra02313g1.pdf [file c4ra02313g1.pdf]

## Supplementary Information for

### Facile synthesis of magnetic hierarchical MgO-MgFe<sub>2</sub>O<sub>4</sub> composites and their adsorption performance towards Congo red

*Xiuying Han, Peng Tian, Hongchang Pang, Qiang Song, Guiling Ning,\* Yanhao Yu, and Haixia Fang*

*State Key Laboratory of Fine Chemicals and School of Chemical Engineering, Dalian University of Technology, Dalian 116023, China*

*E-mail: [ninggl@dlut.edu.cn](mailto:ninggl@dlut.edu.cn)*

#### CAPTIONS:

|                                                                                                                 |    |
|-----------------------------------------------------------------------------------------------------------------|----|
| <b>Experimental</b> .....                                                                                       | S2 |
| <b>Fig.S1</b> SEM images of the as-synthesized MCH template.....                                                | S3 |
| <b>Fig.S2.</b> Illustration of the application process of MgO-MgFe <sub>2</sub> O <sub>4</sub> composites ..... | S4 |

## **Experimental**

### **Preparation of hierarchical MCH**

The ethanol (95%, 50 mL) was transferred to a 250 mL three-necked flask. And  $\text{MgCl}_2\text{-NH}_4\text{HCO}_3$  mixed aqueous solution (60mL, containing 0.4mol/L of  $\text{Mg}(\text{HCO}_3)_2$ ) was added into the vigorously stirred ethanol. Then a white precipitation was collected, filtered off, and washed with water, then dispersed in 120 mL of deionized water in a 250 mL beaker. Subsequently, the suspension was maintained at the 80 °C for 2 h. After that, the white powder was collected, filtered off, washed with water and ethanol three times, and dried in blast drying oven at 60 °C for 4h

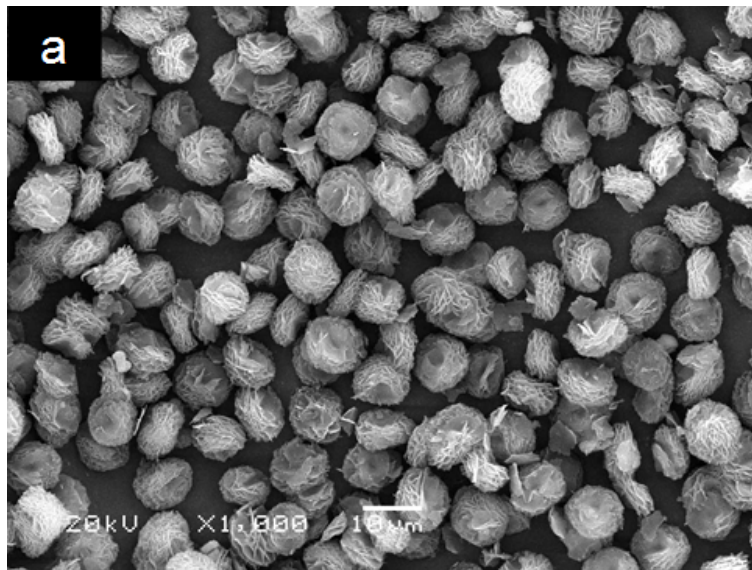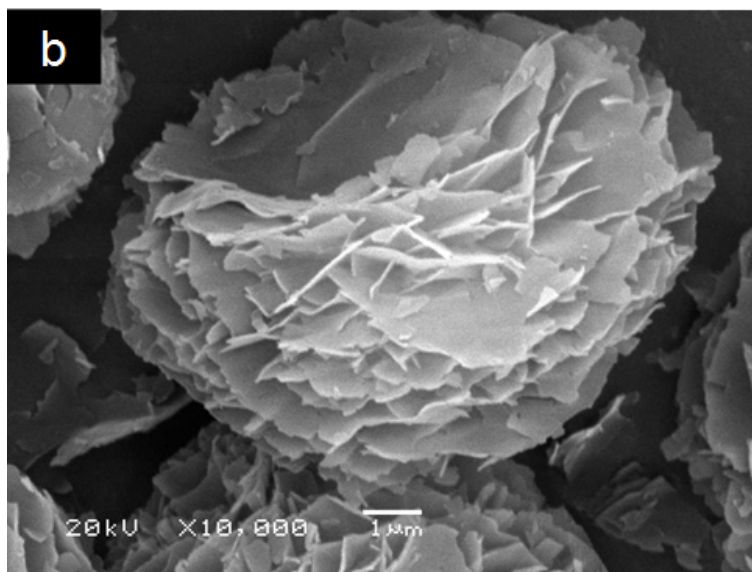

**Fig. S1** SEM images of the as-synthesized MCH template.

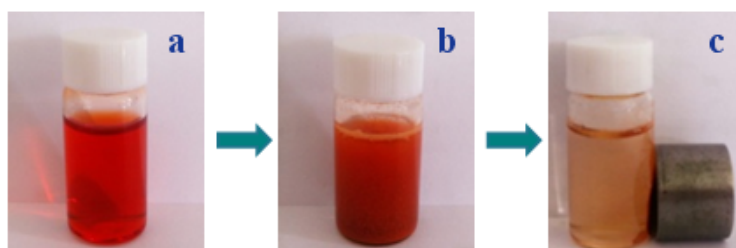

**Fig.S2.** Illustration of the application process of MgO-MgFe<sub>2</sub>O<sub>4</sub> composites (a) CR solution (500mg/L), (b) after dispersing and shaking, (c) Magnetic separation under an external magnetic field.
